# Supplementary material for: Host adaption to the bacteriophage carrier state of Campylobacter jejuni
Source: PubMed Central journal article supplement (PMC4534711; doi:10.1016/j.resmic.2015.05.003), 2015

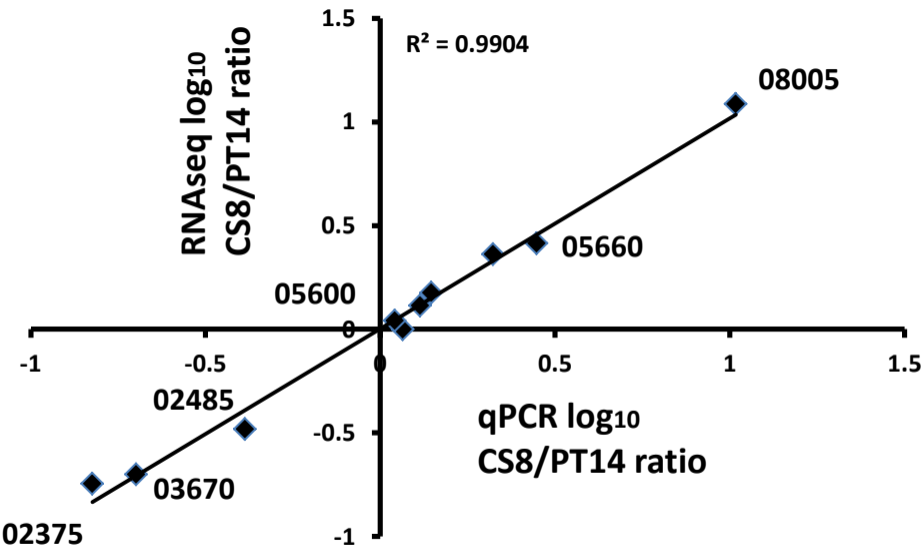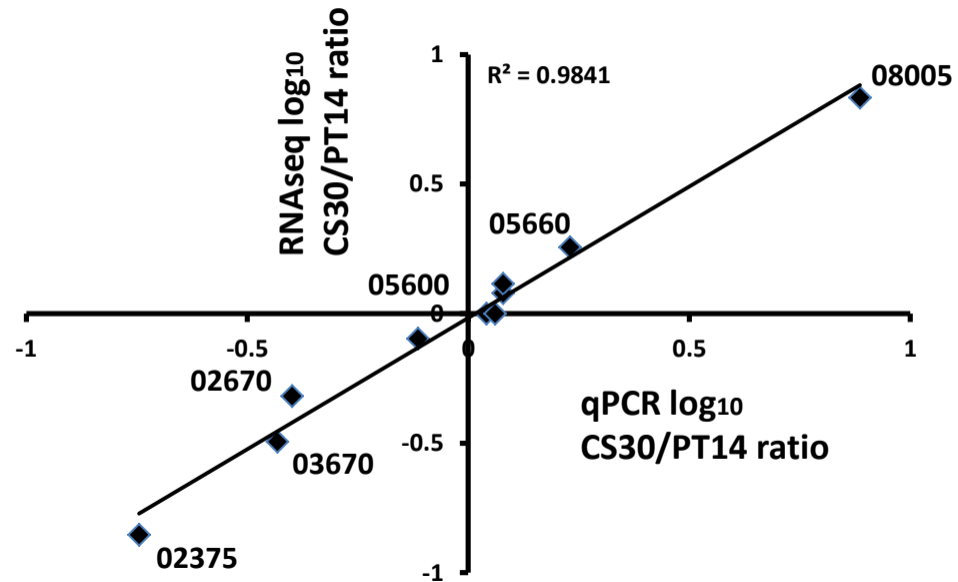

Supplement: mmc2.pdf [file mmc2.pdf]
